# Supplementary material for: Morpholine Radical in the Electrochemical Reaction with Quinoline N-Oxide
Source: MDPI journal article supplement (doi:10.3390/catal13091279), 2023-09-05
Supplement: s1 [file s1]

---

*Supplementary Materials*

# Morpholine Radical in the Electrochemical Reaction with Quinoline *N*-Oxide

Egor L. Dolengovski <sup>1</sup>, Tatyana V. Gryaznova <sup>1</sup>, Oleg G. Sinyashin <sup>1</sup>, Elena L. Gavrilova <sup>2</sup>, Kirill V. Kholin <sup>2</sup> and Yulia H. Budnikova <sup>1,\*</sup>

<sup>1</sup> Arbuzov Institute of Organic and Physical Chemistry, FRC Kazan Scientific Center, Russian Academy of Sciences, 8 Arbuzov Street, Kazan 420088, Russia; dolengovski@gmail.com (E.L.D.); tatyana@iopc.ru (T.V.G.); oleg@iopc.ru (O.G.S.)

<sup>2</sup> Organic Chemistry Department, Kazan National Research Technological University, 68 Karl Marx Street, Kazan 420015, Russia; gavrilova\_elena\_@mail.ru (E.L.G.); kholin06@mail.ru (K.V.K.)

\* Correspondence: yulia@iopc.ru

### General electrolysis procedure

The electrochemical cell equipped with a magnetic stir bar was loaded with 1.38 mmol quinoline *N*-oxide, 0.14 mmol copper acetate, 1.65 (or 4.14) mmol morpholine and 5 mmol K<sub>3</sub>PO<sub>4</sub> in acetonitrile (20 ml) at 25°C under argon. The reaction mixture was stirred at room temperature. 2*F* electricity (the electrolysis time is 75 min), or 3*F* (115 min) or 4*F* (150 min) have been passed at 60 mA current (3 mA/cm<sup>2</sup> current density). At the end of electrolysis precipitation of K<sub>3</sub>PO<sub>4</sub> was filtered out, the reaction mixture was evaporated on rotary evaporator, was washed with chloroform. The residue after removal of chloroform was purified by passing through chromatographic column with silica gel (hexane-ethyl acetate eluent).

**Table S1.** Electrochemical cross-coupling products of morpholine and *N*-oxide, 60 mA.

| No | N-oxide                               | Ratio<br>morpholine:<br>N-oxide | Catalyst             | Solvent                         | Base                           | Number of<br>electrons<br>(Faradays) | Product<br>(yield, %) |
|----|---------------------------------------|---------------------------------|----------------------|---------------------------------|--------------------------------|--------------------------------------|-----------------------|
| 1  | quinoline <i>N</i> -oxide             | 1.2:1                           | Cu(OAc) <sub>2</sub> | CH <sub>3</sub> CN              | -                              | 2                                    | <b>5</b> (54)         |
| 2  | quinoline <i>N</i> -oxide             | 1.2:1                           | Cu(OAc) <sub>2</sub> | CH <sub>3</sub> CN              | -                              | 3                                    | <b>6</b> (31)         |
| 3  | quinoline <i>N</i> -oxide             | 2.4:1                           | Cu(OAc) <sub>2</sub> | CH <sub>3</sub> CN              | -                              | 4                                    | <b>4</b> (48)         |
| 4  | quinoline <i>N</i> -oxide             | 1.2:1                           | Cu(OAc) <sub>2</sub> | CH <sub>3</sub> CN              | K <sub>3</sub> PO <sub>4</sub> | 2                                    | <b>5</b> (80)         |
| 5  | quinoline <i>N</i> -oxide             | 1.2:1                           | Cu(OAc) <sub>2</sub> | CH <sub>3</sub> CN              | K <sub>3</sub> PO <sub>4</sub> | 3                                    | <b>6</b> (67)         |
| 6  | quinoline <i>N</i> -oxide             | 3:1                             | Cu(OAc) <sub>2</sub> | CH <sub>3</sub> CN              | K <sub>3</sub> PO <sub>4</sub> | 4                                    | <b>4</b> (52)         |
| 7* | quinoline <i>N</i> -oxide             | 3:1                             | Cu(OAc) <sub>2</sub> | CH <sub>2</sub> Cl <sub>2</sub> | K <sub>3</sub> PO <sub>4</sub> | 4                                    | <b>3</b> (64)         |
| 8  | quinoline <i>N</i> -oxide             | 1.2:1                           | AgOAc                | CH <sub>3</sub> CN              | -                              | 2                                    | <b>5</b> (32)         |
| 9  | quinoline <i>N</i> -oxide             | 1.2:1                           | AgOAc                | CH <sub>3</sub> CN              | -                              | 3                                    | <b>6</b> (24)         |
| 10 | quinoline <i>N</i> -oxide             | 3:1                             | AgOAc                | CH <sub>3</sub> CN              | -                              | 4                                    | <b>4</b> (46)         |
| 11 | <i>iso</i> -quinoline <i>N</i> -oxide | 1.2:1                           | Cu(OAc) <sub>2</sub> | CH <sub>3</sub> CN              | -                              | 3                                    | <b>8</b> (62)         |
| 12 | pyridine- <i>N</i> -oxide             | 1.2:1                           | Cu(OAc) <sub>2</sub> | CH <sub>3</sub> CN              | -                              | 3                                    | not<br>selectively    |
| 13 | pyridine- <i>N</i> -oxide             | 1.2:1                           | Cu(OAc) <sub>2</sub> | CH <sub>2</sub> Cl <sub>2</sub> | K <sub>3</sub> PO <sub>4</sub> | 3                                    | traces                |

|      |                                   |       |                      |                    |                                |   |               |
|------|-----------------------------------|-------|----------------------|--------------------|--------------------------------|---|---------------|
| 14   | phenylpyridine<br><i>N</i> -oxide | 1.2:1 | Cu(OAc) <sub>2</sub> | CH <sub>3</sub> CN | -                              | 3 | traces        |
| 15** | phenylpyridine<br><i>N</i> -oxide | 1.2:1 | Cu(OAc) <sub>2</sub> | CH <sub>3</sub> CN | K <sub>3</sub> PO <sub>4</sub> | 3 | <b>9</b> (14) |

\* additive of Et<sub>4</sub>NBF<sub>4</sub> (0.02M) was used for better electroconductivity.

\*\*by Spectrum <sup>1</sup>H NMR spectroscopy and mass-spectrum

**4-(Quinolin-4-yl)morpholine (3)** [1,2]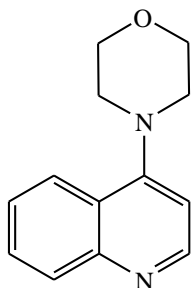

Yellow solid, m.p. 83–85 °C. Yield 0.19 g (64%).  $^1\text{H}$  NMR (399.9 MHz,  $\text{CDCl}_3$ ):  $\delta$  8.71 (d,  $J$  = 8.8 Hz, 1H), 8.06 (d,  $J$  = 8.0 Hz, 1H), 7.85 (d,  $J$  = 8.1 Hz, 1H), 7.62 (t,  $J$  = 6.9 Hz, 1H), 7.45 (t,  $J$  = 7.1 Hz, 1H), 7.29 (d,  $J$  = 6.4 Hz, 1H), 4.04 (t,  $J$  = 4.7 Hz, 4H), 3.23 (t,  $J$  = 4.8 Hz, 4H).  $^{13}\text{C}$  NMR (100.6 MHz,  $\text{CDCl}_3$ ),  $\delta$  ppm: 158.14 ( $\text{C}_i$ ), 149.36 (CH), 141.95 ( $\text{C}_i$ ), 130.95 (CH), 129.25 (CH), 128.63 (CH), 127.29 ( $\text{C}_i$ ), 126.66 (CH), 118.09 (CH), 66.30 ( $\text{CH}_2$ ), 53.85 ( $\text{CH}_2$ ). MS (ESI),  $m/z$ : 215.1 [ $\text{M} + 1$ ] $^+$ . Anal. calc. (%): C 72.87; H 6.59; N 13.07.  $\text{C}_{13}\text{H}_{14}\text{N}_2\text{O}$ . Found (%): C 72.69; H 6.35; N 13.12.

**4,4'-(Quinoline-2,4-diyl)dimorpholine (4)** [3]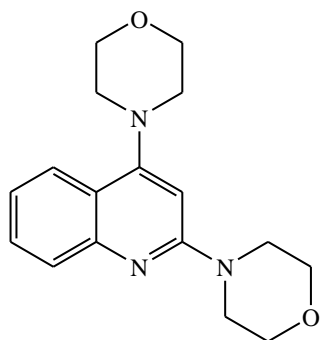

Yellow solid, m.p. 165–167 °C. Yield 0.21 g (52%).  $^1\text{H}$  NMR (399.9 MHz,  $\text{CDCl}_3$ ):  $\delta$  8.28 (d,  $J$  = 7.5 Hz, 1H), 8.08 (m, 2H), 7.79 (d,  $J$  = 6.9 Hz, 1H), 7.55 (t,  $J$  = 7.1 Hz, 1H), 3.71 (t,  $J$  = 4.5 Hz, 4H), 3.67 (t,  $J$  = 4.8 Hz, 4H), 3.59 (t,  $J$  = 4.8 Hz, 4H), 3.40 (t,  $J$  = 4.85 Hz, 4H).  $^{13}\text{C}$  NMR (100.6 MHz,  $\text{CDCl}_3$ ),  $\delta$  ppm: 159.22 ( $\text{C}_i$ ), 152.74 ( $\text{C}_i$ ), 141.32 ( $\text{C}_i$ ), 129.83 (CH), 128.86 (CH), 128.77 (CH), 123.98 ( $\text{C}_i$ ), 123.37 (CH), 109.47 (CH), 61.32. ( $\text{CH}_2$ ), 61.07 ( $\text{CH}_2$ ), 52.80 ( $\text{CH}_2$ ), 52.74 ( $\text{CH}_2$ ). MS (ESI),  $m/z$ : 300.2 [ $\text{M} + 1$ ] $^+$ . Anal. calc. (%): C 68.20; H 7.07; N 14.04.  $\text{C}_{17}\text{H}_{21}\text{N}_3\text{O}_2$ . Found (%): C 68.01; H 6.85; N 14.14.

**2-Morpholinoquinoline 1-oxide (5)** [4,5]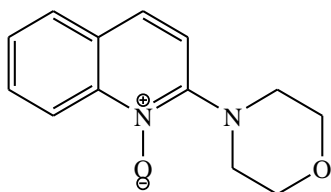

Yellow solid, m.p. 126–128 °C. Yield 0.25 g (80%).  $^1\text{H}$  NMR (399.9 MHz,  $\text{CDCl}_3$ ):  $\delta$  8.82 (d,  $J$  = 8.6 Hz, 1H), 8.39 (d,  $J$  = 6.1 Hz, 1H), 7.95 (d,  $J$  = 8.1 Hz, 1H), 7.86–7.82 (m, 2H), 7.55 (t,  $J$  = 8.1 Hz, 1H), 3.92 (t,  $J$  = 4.7 Hz, 4H), 3.56 (t,  $J$  = 4.7 Hz, 4H).  $^{13}\text{C}$  NMR (100.6 MHz,  $\text{CDCl}_3$ ),  $\delta$  ppm: 152.19 ( $\text{C}_i$ ), 141.92 ( $\text{C}_i$ ), 130.91 (CH), 129.21 (CH), 128.59 (CH), 126.63 (CH), 124.13 ( $\text{C}_i$ ), 120.12 (CH), 118.51 (CH), 68.44 ( $\text{CH}_2$ ), 46.85 ( $\text{CH}_2$ ). MS (ESI),  $m/z$ : 231.1 [ $\text{M} + 1$ ] $^+$ . Anal. calc. (%): C 67.81; H 6.13; N 12.17;  $\text{C}_{13}\text{H}_{14}\text{N}_2\text{O}_2$ ; Found (%): C 67.92; H 6.25; N 12.12.

**2-Morpholinoquinoline (6) [6]**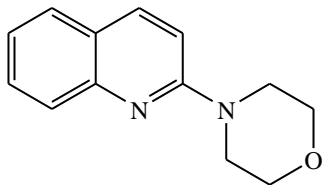

Pale yellow solid, m.p. 87–89 °C. Yield 0.19g (67%).  $^1\text{H}$  NMR (399.9 MHz,  $\text{CDCl}_3$ ):  $\delta$  8.18 (d,  $J$  = 8.68 Hz, 1H), 7.99 (d,  $J$  = 6.0 Hz, 1H), 7.75 (d,  $J$  = 6.0 Hz, 1H), 7.53 (t,  $J$  = 7.9 Hz, 1H), 7.40 (d,  $J$  = 8.0 Hz, 1H), 6.92 (d,  $J$  = 7.6 Hz, 1H), 3.86 (t,  $J$  = 4.6 Hz, 4H), 3.68 (t,  $J$  = 4.6 Hz, 4H).  $^{13}\text{C}$  NMR (100.6 MHz,  $\text{CDCl}_3$ ),  $\delta$  ppm: 154.14 ( $\text{C}_i$ ), 141.90 ( $\text{C}_i$ ), 136.06 (CH), 129.19 (CH), 128.57 (CH), 124.11 ( $\text{C}_i$ ), 121.41 (CH), 120.10 (CH), 110.24 (CH), 66.43 ( $\text{CH}_2$ ), 45.56 ( $\text{CH}_2$ ). MS (ESI),  $m/z$ : 215.3  $[\text{M} + 1]^+$ . Anal. calc. (%): C 72.87; H 6.59; N 13.07;  $\text{C}_{13}\text{H}_{14}\text{N}_2\text{O}$ ; Found (%): C 72.76; H 6.48; N 13.10.

**Morpholin-4-ol (7) [7]**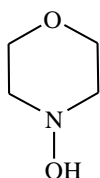

$^1\text{H}$  NMR (399.9 MHz,  $\text{CDCl}_3$ ):  $\delta$  8.08 (s, 1H), 3.70 (t,  $J$  = 4.7 Hz, 2H), 3.66 (t,  $J$  = 4.6 Hz, 2H), 3.58 (t,  $J$  = 4.6 Hz, 4H), 3.68 (t,  $J$  = 4.7 Hz, 4H). MS (ESI),  $m/z$ : 104.1  $[\text{M} + 1]^+$ . Anal. calc. (%): C 46.59; H 8.80; N 13.58.  $\text{C}_4\text{H}_9\text{NO}_2$ ; Found (%): C 46.77; H 8.49; N 13.45.

**4-(Isoquinolin-1-yl)morpholine (8) [8]**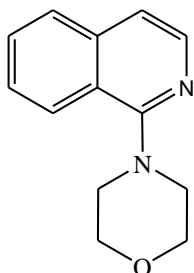

White solid, m.p. 85–88 °C. Yield 0.18g (62%).  $^1\text{H}$  NMR (399.9 MHz,  $\text{CDCl}_3$ ):  $\delta$  8.22 (d,  $J$  = 8.4Hz, 1H), 8.14 (t,  $J$  = 6.1 Hz, 1H), 7.94–7.88 (m, 2H), 7.78 (t,  $J$  = 7.3 Hz, 1H), 7.49 (d,  $J$  = 6.6 Hz, 1H), 4.03 (m, 4H), 3.88 (m, 4H).  $^{13}\text{C}$  NMR (100.6 MHz,  $\text{CDCl}_3$ ),  $\delta$  ppm: 159.69 ( $\text{C}_i$ ), 139.69 ( $\text{C}_i$ ), 137.38 (CH), 130.13 (CH), 127.30 (CH), 126.28 (CH), 125.09 ( $\text{C}_i$ ), 122.74 (CH), 117.05 (CH), 68.01 ( $\text{CH}_2$ ), 52.35 ( $\text{CH}_2$ ). MS (ESI),  $m/z$ : 215.1  $[\text{M} + 1]^+$ . Anal. calc. (%): C 72.87; H 6.59; N 13.07;  $\text{C}_{13}\text{H}_{14}\text{N}_2\text{O}$ ; Found (%): C 72.69; H 6.42; N 13.15.

## References

1. Yang, Yu.; Chen, F.; Tang, L.; Geng, H.; Yao, Z. Preparation of 4-aminoquinoline derivatives by palladium and copper synergistically catalyzed oxidative aromatization. CN115947684 A, 11 April 2023.
2. Margolis, B.J.; Long, K.A.; Laird, D.L.T.; Ruble, J.C.; Pulley, S.R. Assembly of 4-Aminoquinolines via Palladium Catalysis: A Mild and Convenient Alternative to S N Ar Methodology. *J. Org. Chem.* **2007**, *72*, 2232–2235.
3. Strekowski, L.; Patterson S.E.; Janda, L.; Wydra, R L.; Harden, D.B.; Lipowska, M.; Cegla M.T. Further studies on the cyclization of aromatic azomethines ortho-substituted with a trifluoromethyl group: synthesis of 2,4-di- or 2,3,4-trisubstituted quinolines. *J. Org. Chem.* **1992**, *57*, 196–201.
4. Tapan, S.; Dinesh, T.; Baran, P.A.; Chandra, G.S. Copper/manganese oxide catalyzed regioselective amination of quinoline N-oxides: An example of synergistic cooperative catalysis. *Tetrahedron Lett.*, **2021**, *83*, 153415. <https://doi.org/10.1016/j.tetlet.2021.153415>
5. Li, G.; Jia, C.; Sun, K.; Lv, Y.; Zhao, F.; Zhou, K.; Wu, H. Copper(II)-Catalyzed Electrophilic Amination of Quinoline N-Oxides with O-Benzoyl Hydroxylamines. *Org. Biomol. Chem.* **2015**, *13*, 3207–3210.
6. Wong, Sh. M.; Choy, P.Y.; Zhao, Q.; Yuen, O.Y.; Yeung, Ch.Ch.; So, Ch.M.; Kwong F. Y. Design of Benzimidazolyl Phosphines Bearing Alterable P,O or P,N-Coordination: Synthesis, Characterization, and Insights into Their Reactivity. *Organometallics*, **2021**, *40*, 2265–2271.
7. Kondratev, V.B.; Malenkov, M.Yu.; Kaabak, L.V.; Golikov, A.G.; Golovkov, V.F. Method for the production of N-hydroxy morpholine. RU2757983C1, 25 October 2021.
8. Inami, A.; Nishii, Y.; Hirano, K.; Miura M. Rhodium-Catalyzed Isoquinoline Synthesis Using Vinyl Selenone as Oxidizing Acetylene Surrogate, *Org. Lett.*, **2023**, *25*, 3206–3209.

## Copies of $^1\text{H}$ , $^{13}\text{C}$ NMR Spectra for the Products

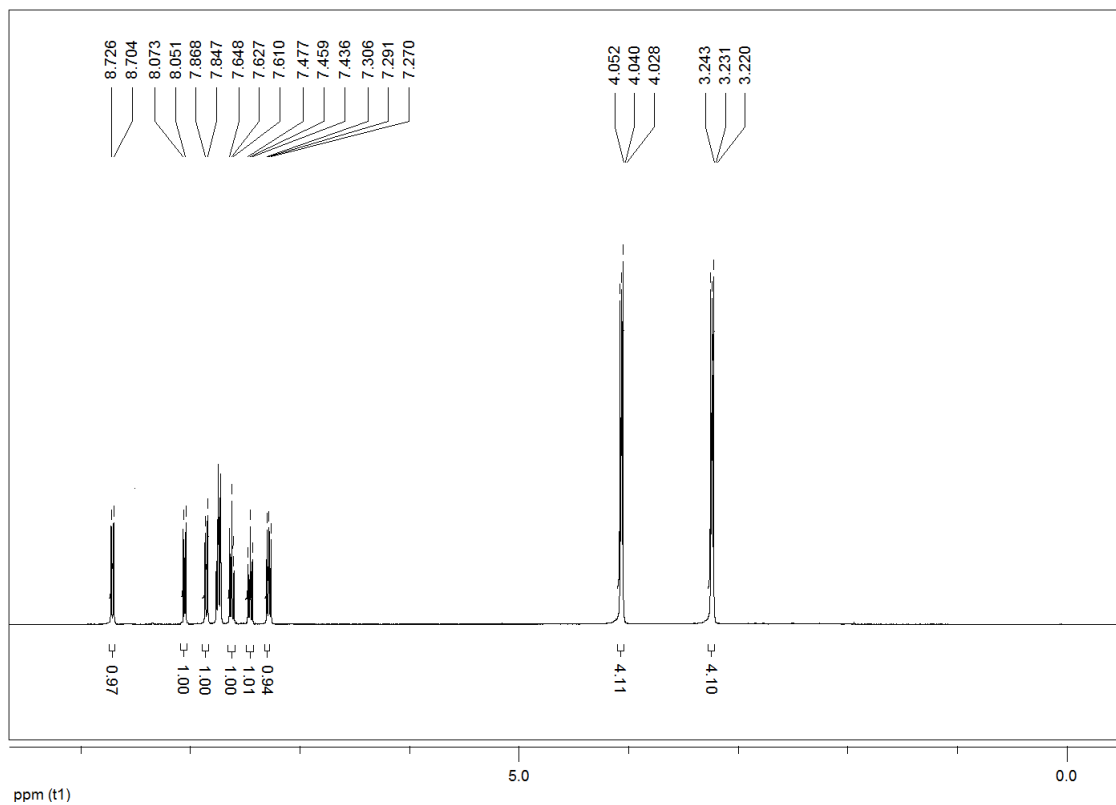

Figure S1. Spectrum  $^1\text{H}$  NMR of 4-(Quinolin-4-yl)morpholine (3) in  $\text{CDCl}_3$ .

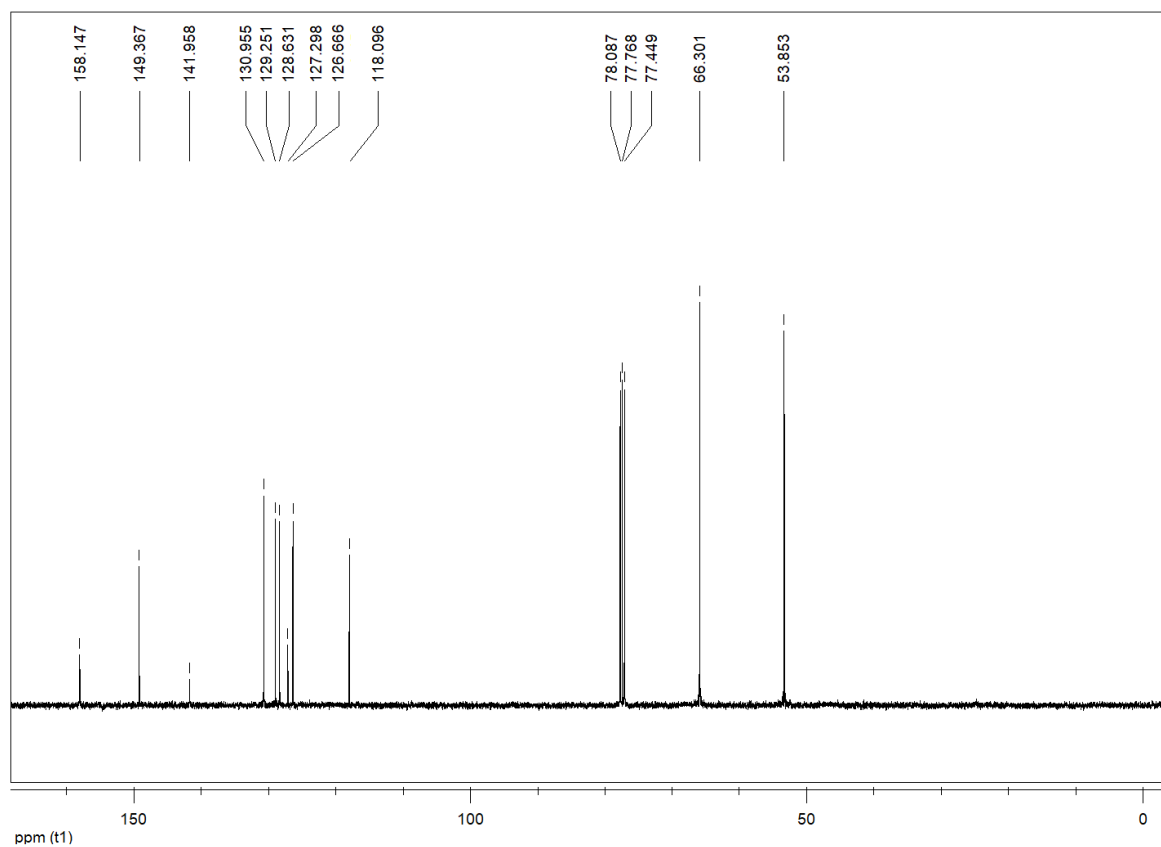

Figure S2. Spectrum  $^{13}\text{C}$  NMR of 4-(Quinolin-4-yl)morpholine (3) in  $\text{CDCl}_3$ .

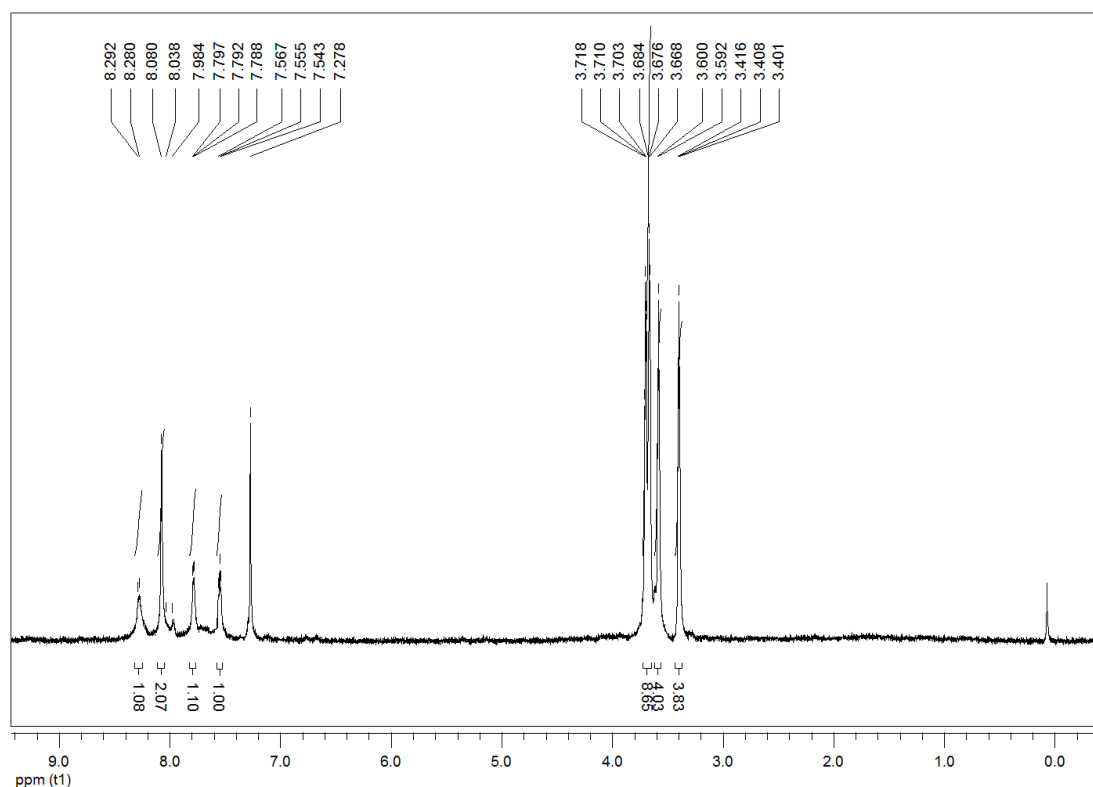

Figure S3. Spectrum <sup>1</sup>H NMR of 4,4'-(Quinoline-2,4-diyl)dimorpholine (4) in CDCl<sub>3</sub>.

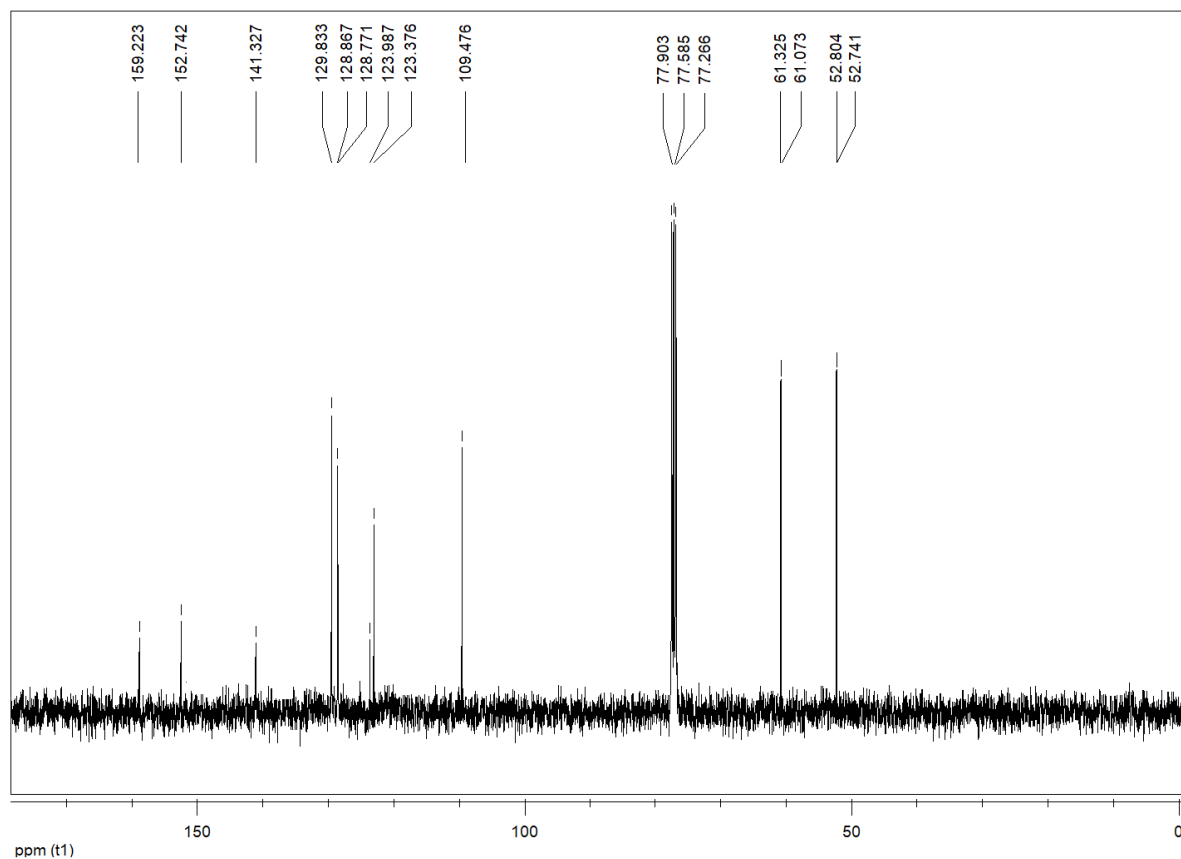

Figure S4. Spectrum <sup>13</sup>C NMR of 4,4'-(Quinoline-2,4-diyl)dimorpholine (4) in CDCl<sub>3</sub>.



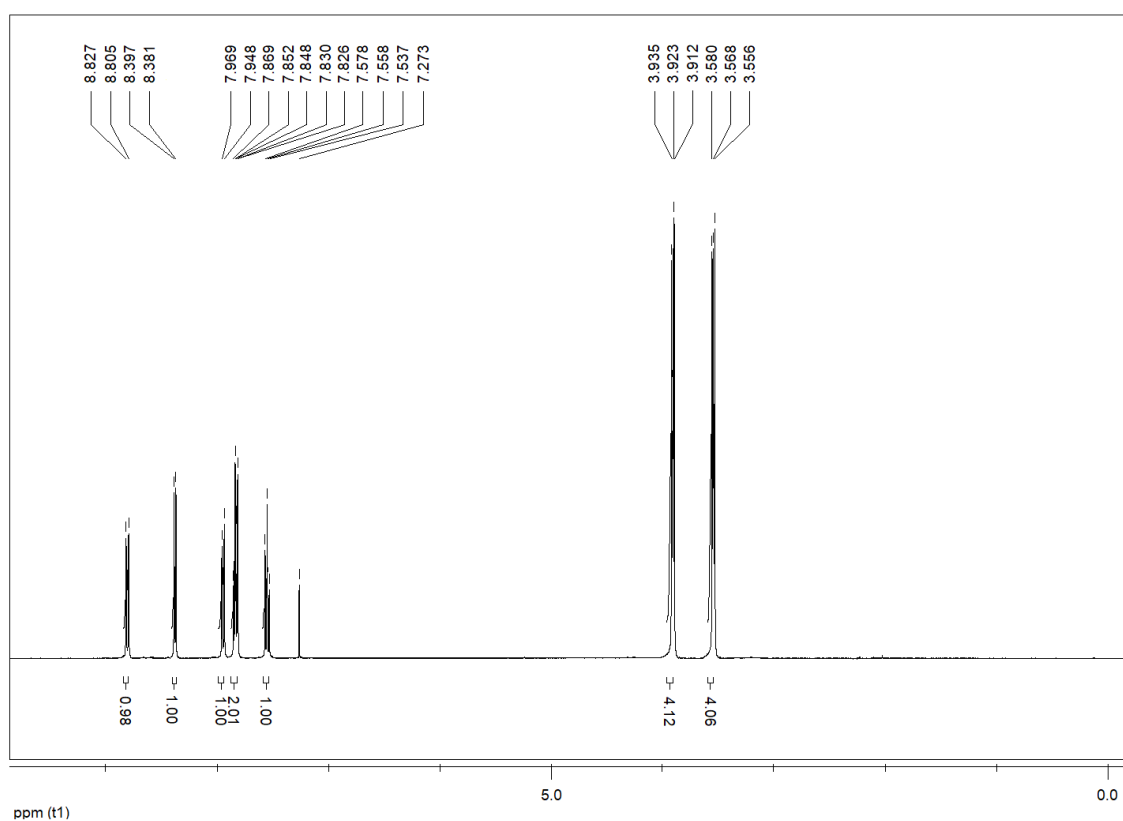

Figure S5. Spectrum <sup>1</sup>H NMR of 2-morpholinoquinoline 1-oxide (5) in CDCl<sub>3</sub>.

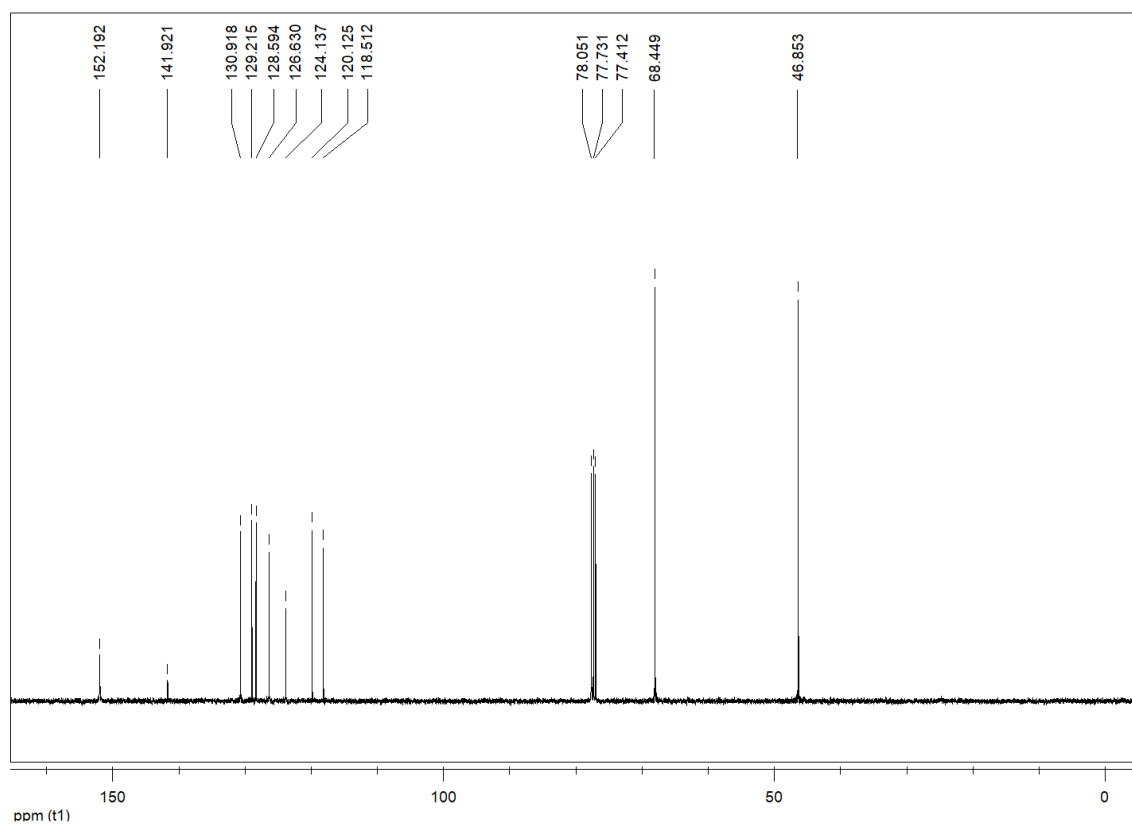

Figure S6. Spectrum <sup>13</sup>C NMR of 2-morpholinoquinoline 1-oxide (5) in CDCl<sub>3</sub>.

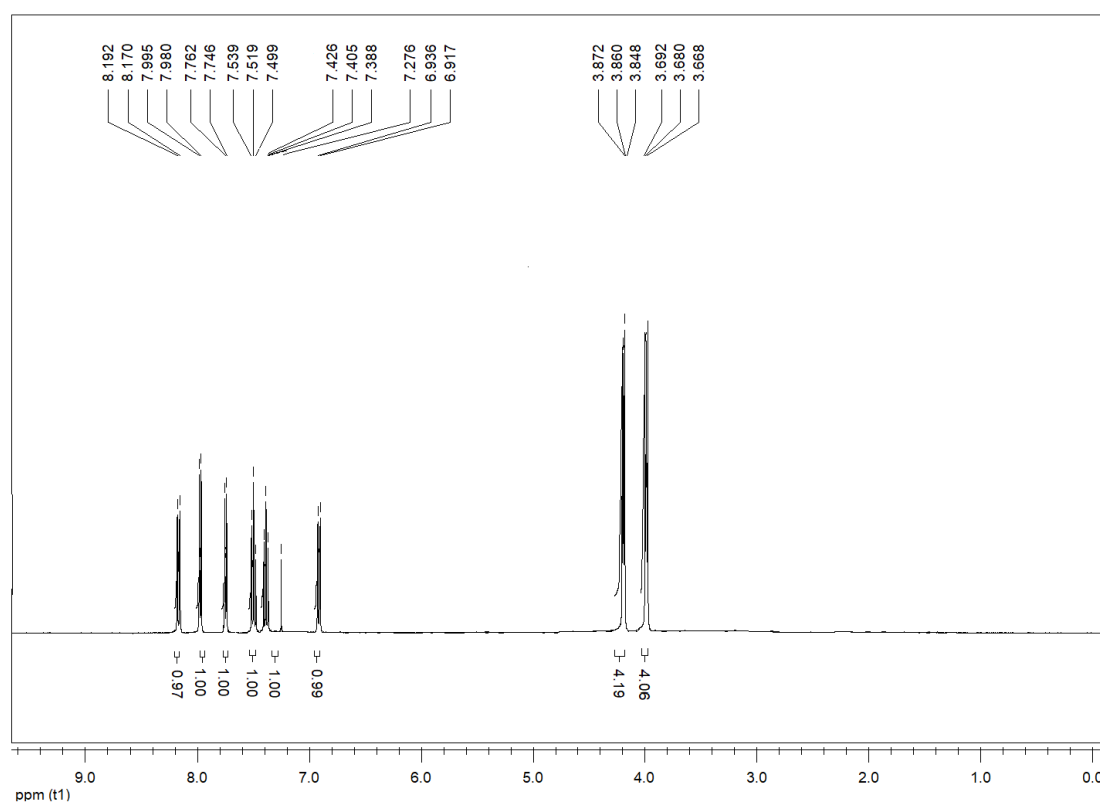

Figure S7. Spectrum <sup>1</sup>H NMR of 2-morpholinoquinoline (6) in CDCl<sub>3</sub>.

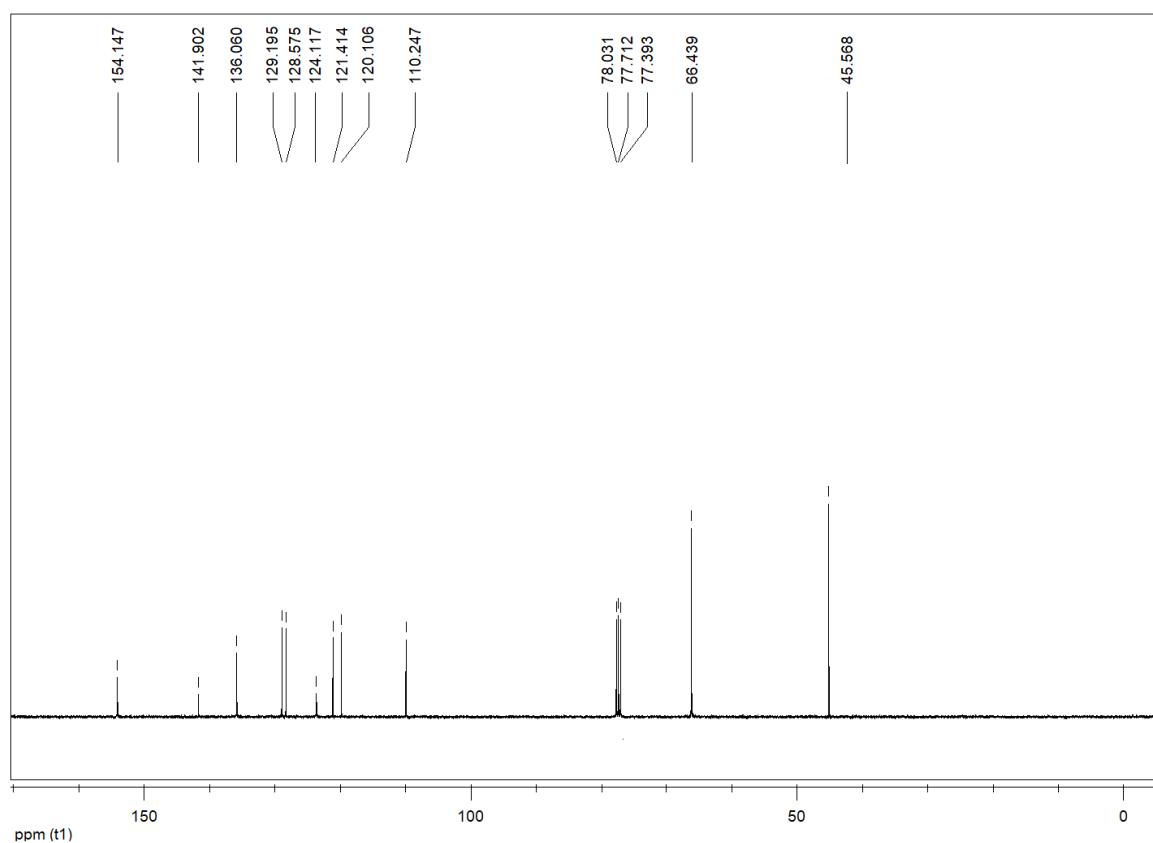

Figure S8. Spectrum <sup>13</sup>C NMR of 2-morpholinoquinoline (6) in CDCl<sub>3</sub>.

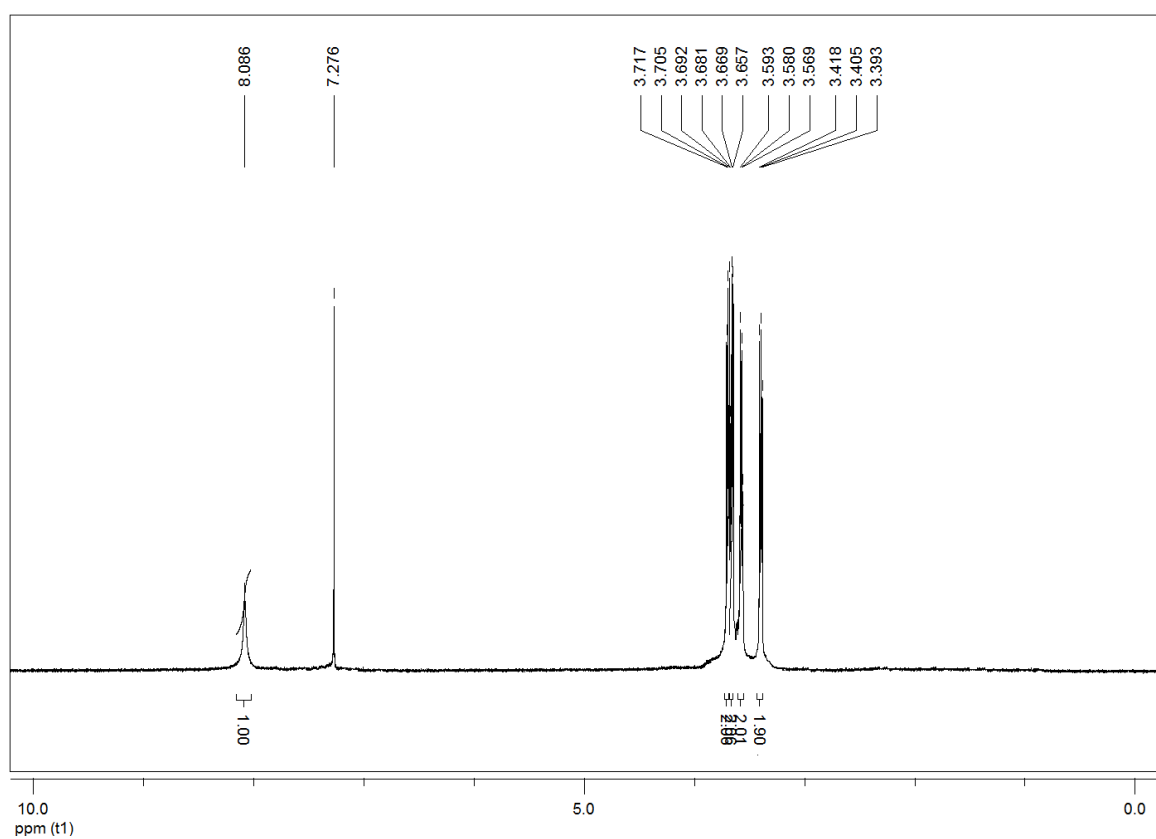

Figure S9. Spectrum <sup>1</sup>H NMR of morpholine-1-oxide (7) in CDCl<sub>3</sub>.

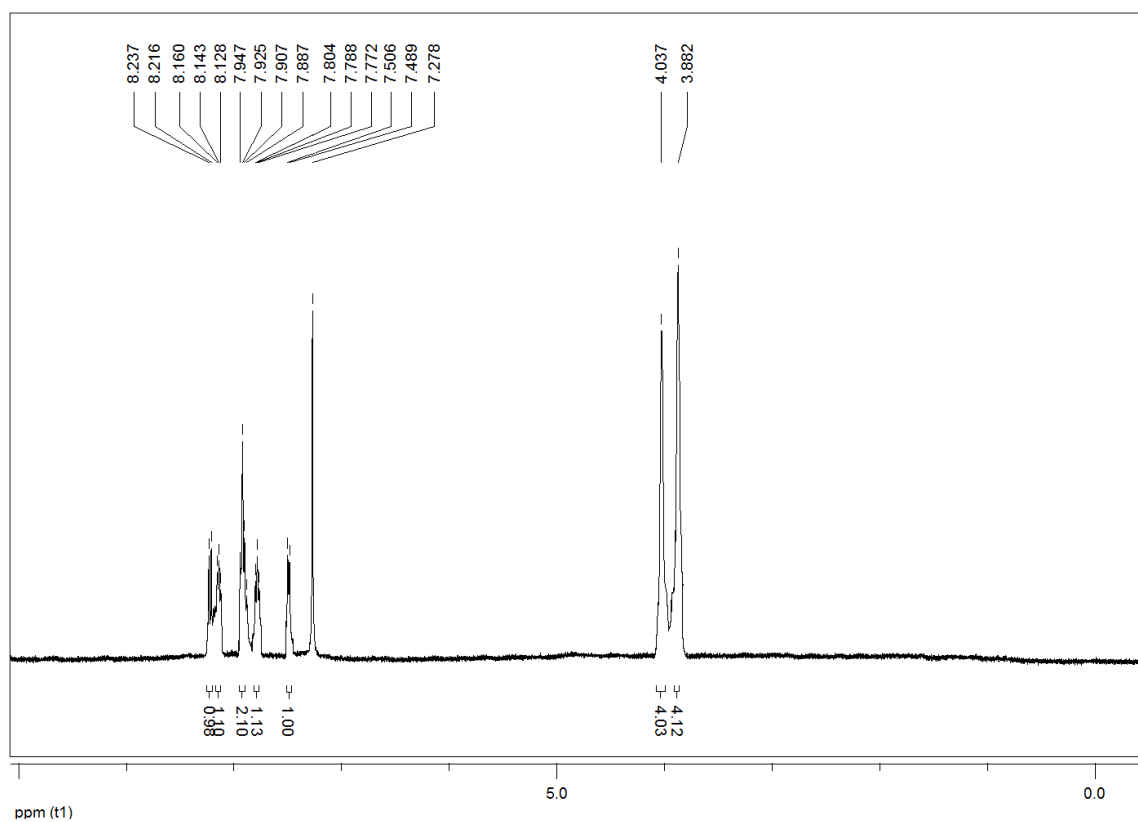

Figure S10. Spectrum <sup>1</sup>H NMR 4-(isoquinolin-1-yl)morpholine (8) in CDCl<sub>3</sub>.

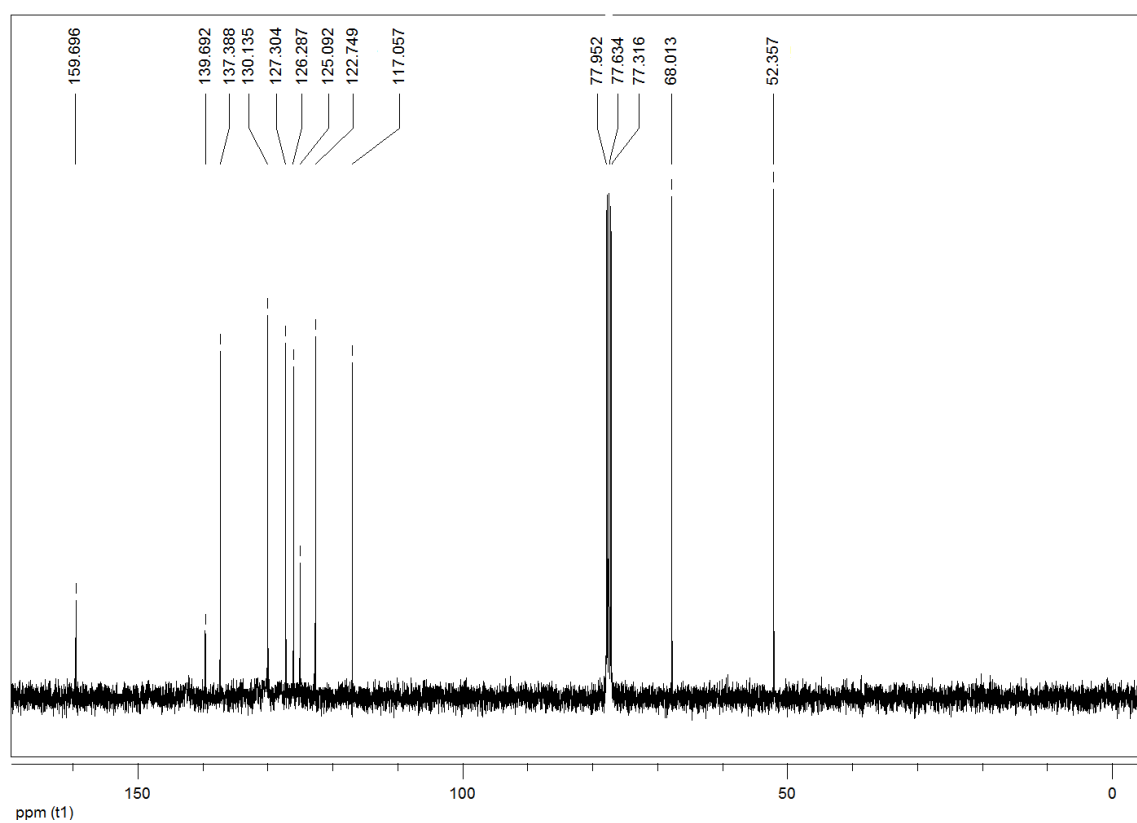

Figure S11. Spectrum  $^{13}\text{C}$  NMR of 4-(isoquinolin-1-yl)morpholine (8) in  $\text{CDCl}_3$ .
